# Supplementary material
Source: ML conference proceedings conference paper supplement (https://openaccess.thecvf.com/content/cvpr_2016/html/Wolff_Regularity-Driven_Facade_Matching_2016_CVPR_paper.html)
Supplement: Supplementary file 1 [file Wolff_Regularity-Driven_Facade_Matching_2016_CVPR_supplemental.pdf]

# Regularity-Driven Building Facade Matching between Aerial and Street Views ( Supplemental Material )

Mark Wolff      Robert T. Collins      Yanxi Liu  
 School of Electrical Engineering and Computer Science  
 The Pennsylvania State University  
 University Park, PA. 16802, USA  
[wolff@psu.edu](mailto:wolff@psu.edu), {[rcollins](mailto:rcollins@cse.psu.edu), [yanxi](mailto:yanxi@cse.psu.edu)}@cse.psu.edu

## 1. Sample Aerial View and Street View Matches from 3 Cities

Table 1 demonstrates 10 successful aerial-ground facade matching examples from NYC/Rome/SF, respectively. Specifically, we show interesting/difficult matches for facades which appear at significantly different viewing angles or lighting conditions.

Table 1: Facade Panel showing 30 sample facade match sets. We show 10 sets for **each** city in our test set.

| City | Aerial                                                                              | Aerial Lattice                                                                      | Sample Street Matches                                                               |                                                                                       |                                                                                       |
|------|-------------------------------------------------------------------------------------|-------------------------------------------------------------------------------------|-------------------------------------------------------------------------------------|---------------------------------------------------------------------------------------|---------------------------------------------------------------------------------------|
| NYC  |  |  |  |  |  |
| NYC  |  |  |  |  |  |
| NYC  |  |  |  |  |  |



| City | Aerial                                                                              | Aerial Lattice                                                                      | Sample Street Matches                                                               |                                                                                       |                                                                                       |
|------|-------------------------------------------------------------------------------------|-------------------------------------------------------------------------------------|-------------------------------------------------------------------------------------|---------------------------------------------------------------------------------------|---------------------------------------------------------------------------------------|
| NYC  | 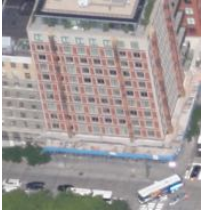   |    |    |    |    |
| NYC  |    |    |    |    |    |
| NYC  |    |    |   |   |   |
| NYC  |  |  |  |  |  |
| NYC  |  |  |  |  |  |
| NYC  |  |  |  |  |  |



| City | Aerial                                                                              | Aerial Lattice                                                                      | Sample Street Matches                                                               |                                                                                       |                                                                                       |
|------|-------------------------------------------------------------------------------------|-------------------------------------------------------------------------------------|-------------------------------------------------------------------------------------|---------------------------------------------------------------------------------------|---------------------------------------------------------------------------------------|
| NYC  | 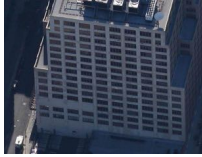   |    |    |    |    |
| Rome |    |    |    |    |    |
| Rome |    |    |   |   |   |
| Rome |  |  |  |  |  |
| Rome |  |  |  |  |  |
| Rome |  |  |  |  |  |

| City | Aerial                                                                              | Aerial Lattice                                                                      | Sample Street Matches                                                               |                                                                                       |                                                                                       |
|------|-------------------------------------------------------------------------------------|-------------------------------------------------------------------------------------|-------------------------------------------------------------------------------------|---------------------------------------------------------------------------------------|---------------------------------------------------------------------------------------|
| Rome |    |    |    |    |    |
| Rome |    |    |    |    |    |
| Rome |   |   |   |   |   |
| Rome |  |  |  |  |  |
| Rome |  |  |  |  |  |



| City | Aerial                                                                              | Aerial Lattice                                                                      | Sample Street Matches                                                               |                                                                                       |                                                                                       |
|------|-------------------------------------------------------------------------------------|-------------------------------------------------------------------------------------|-------------------------------------------------------------------------------------|---------------------------------------------------------------------------------------|---------------------------------------------------------------------------------------|
| SF   |    |    |    |    |    |
| SF   |   |   |   |   |   |
| SF   |  |  |  |  |  |
| SF   |  |  |  |  |  |

| City | Aerial                                                                              | Aerial Lattice                                                                      | Sample Street Matches                                                               |                                                                                       |                                                                                       |
|------|-------------------------------------------------------------------------------------|-------------------------------------------------------------------------------------|-------------------------------------------------------------------------------------|---------------------------------------------------------------------------------------|---------------------------------------------------------------------------------------|
| SF   | 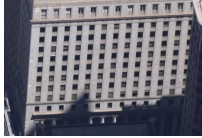   |    |    |    |    |
| SF   |    |    |    |    |    |
| SF   |    |    |   |   |   |
| SF   |  |  |  |  |  |



| City | Aerial                                                                            | Aerial Lattice                                                                    | Sample Street Matches                                                             |                                                                                     |                                                                                     |
|------|-----------------------------------------------------------------------------------|-----------------------------------------------------------------------------------|-----------------------------------------------------------------------------------|-------------------------------------------------------------------------------------|-------------------------------------------------------------------------------------|
| SF   | 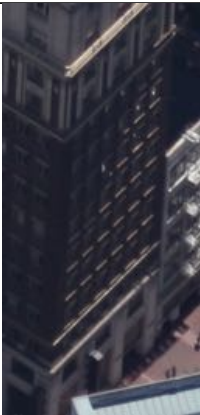 |  |  |  |  |
| SF   |  |  |  |  |  |

## 2. Additional Facade-Match Images

Figure 1 shows another example with different nearby, and potentially similar street-facades which are considered during the matching process.

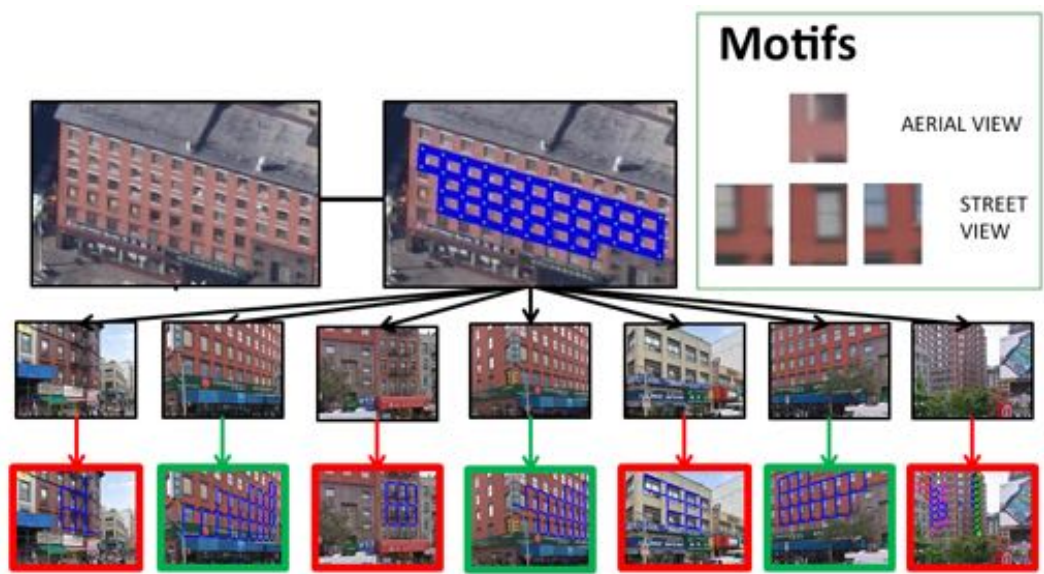

Figure 1. Sample images selected from positive/negative matching results as determined by our matching pipeline (green/red borders, respectively).

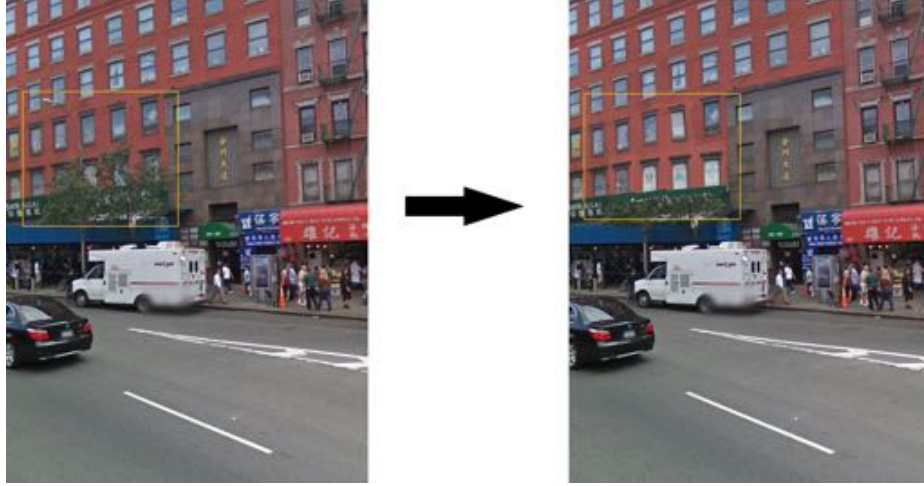

Figure 2. Minor and major occlusion removal is performed by replacing missing/obstructed lattice patches with available patches from another viewpoint.

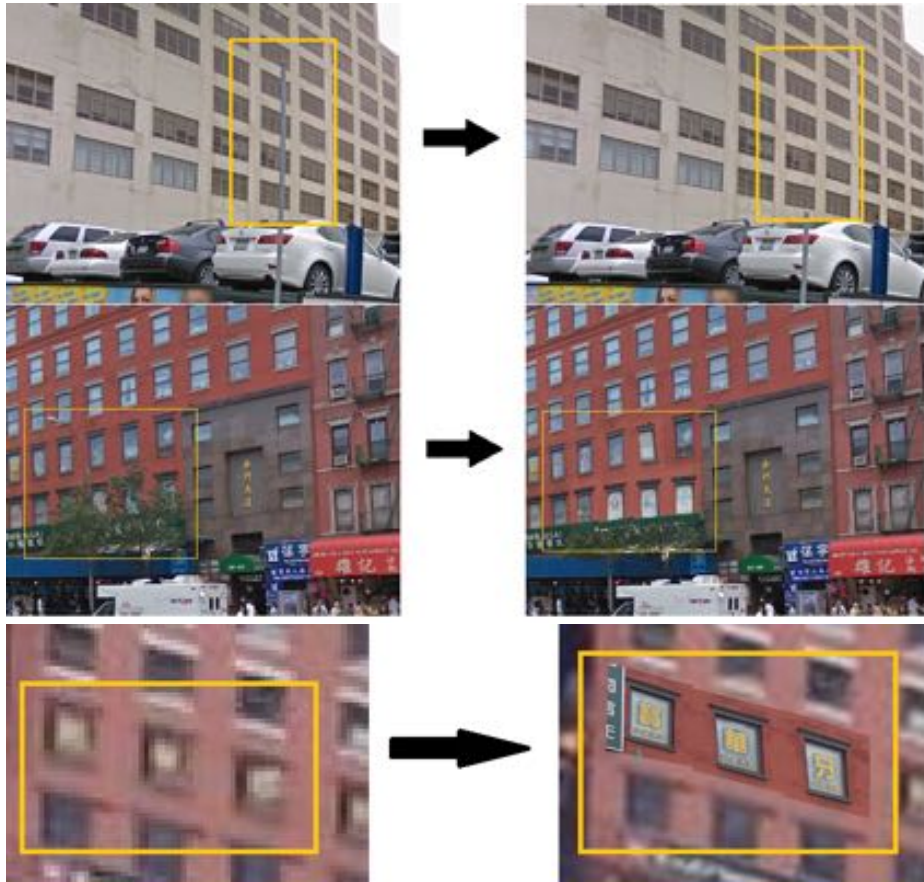

Figure 3. Removal of minor occlusions using texture replacement from a central lattice patch set

### 3. Street-Occlusion Removal and Aerial-Image Enhancement

Finally, we show additional application examples for aerial to street facade matching. With a set of street-level matches, multiple views are available, so occlusions can be removed by replacing lattice patches with its correspondence from another street-view, as shown in Figures 2 and 3.
